# Supplementary material
Source: publisher figshare collection journal article supplement (https://gsajournals.figshare.com/articles/dataset/_/11852550)
Supplement: Supplementary file 1 [file 1]

# **The UCSF Mouse Inventory Database Application, an open source web app for sharing mutant mice within a research community**

File S3 Mouse Database Application README

This README document is available on the develop branch of the Mouse Inventory repository in GitHub. <https://github.com/musIndex/mouseinventory/tree/develop>

# Mouse Inventory Database

---

The mouse inventory database is an application for tracking an institution's inventory of mice for genetics research.

## Features

See the [home page](https://github.com/musIndex/mouseinventory/tree/master) <https://github.com/musIndex/mouseinventory/tree/master>

## Getting Started

The following instructions assume you're working on a Mac.

### Installing Prerequisites

There are four prerequisites that are required to run MouseInventory.

- MariaDB
- Tomcat (version 9)
- Java (version 8)
- Maven (version 3)

The easiest way to install these is using **brew**, a package manager for the Mac.

### Mac

```
git clone git@github.com:musIndex/mouseinventory.git
```

1. install tomcat with brew
2. update tomcat users
3. start tomcat with the following command

## Developing

See the [development notes wiki](#) to learn about how to work with the code.

## Environment Variables

| Environment Variable    | Description                                   | Example                                                                                      |
|-------------------------|-----------------------------------------------|----------------------------------------------------------------------------------------------|
| DB_DRIVER_CLASSNAME     | Classname of the driver for the main database | <code>org.mariadb.jdbc.Driver</code>                                                         |
| DB_CONNECTION_STRING    | Connection string for the main database       | <code>jdbc:mariadb://localhost:3306/mousespace?user=fakeUser&amp;password=b4dp455w0rd</code> |
| MGI_DB_DRIVER_CLASSNAME | Classname of the driver for the MGI database. | <code>org.postgresql.Driver</code>                                                           |

| Environment Variable           | Description                                                                                         | Example                                                                                                  |
|--------------------------------|-----------------------------------------------------------------------------------------------------|----------------------------------------------------------------------------------------------------------|
| MGI_DB_CONNECTION_STRING       | Connection string for the MGI database                                                              | <code>jdbc:postgresql://mgi-adhoc.jax.org:5432/mgd?username=prodUser&amp;password=an0th3rp444w0rd</code> |
| SMTP_SERVER                    | <i>optional</i><br>The URL of the SMTP server.                                                      | <code>smtp.server.com</code>                                                                             |
| SMTP_USER                      | <i>optional</i><br>The username for connecting to SMTP server.                                      | <code>james.bond@mi6.com</code>                                                                          |
| SMTP_PW                        | <i>optional</i><br>The password for connecting to SMTP server.                                      | <code>lic3nset0k1ll</code>                                                                               |
| SMTP_PORT                      | <i>optional</i><br>The port used to connect to SMTP server..                                        | <code>465</code>                                                                                         |
| SMTP_SSL_ENABLED               | <i>optional</i><br>Whether or not to use encrypted SMTP ( <code>true</code> or <code>false</code> ) | <code>true</code>                                                                                        |
| GOOGLE_ANALYTICS_ACCOUNT       | <i>optional</i><br>The account for Google Analytics.                                                | <code>18988</code>                                                                                       |
| GOOGLE_ANALYTICS_DOMAIN_SUFFIX | <i>optional</i><br>The domain suffix used for Google Analytics.                                     | <code>www.example.com</code>                                                                             |

## Setting environment variables

There are a number of ways to set environment variables.

## Command line (Mac/Linux)

Assuming you use the command line to start Tomcat, you can also set the environment variables directly on the command line.

```
export DB_DRIVER_CLASSNAME=org.mariadb.jdbc.Driver
export DB_CONNECTION_STRING="jdbc:mariadb://localhost:3306/mousespace?
user=fakeUser&password=b4dp455w0rd"
export MGI_DB_DRIVER_CLASSNAME=org.postgresql.Driver
export MGI_DB_CONNECTION_STRING="jdbc:postgresql://mgi-adhoc.jax.org:5432/mgd?
username=prodUser&password=an0th3rp444w0rd"
export SMTP_SERVER=""
export SMTP_USER=""
export SMTP_PW=""
export SMTP_PORT=430
export SMTP_SSL_ENABLED=True
export GOOGLE_ANALYTICS_ACCOUNT=""
export GOOGLE_ANALYTICS_DOMAIN_SUFFIX=""
catalina start
```

## Adding to plist (Mac)

If you installed Tomcat using `brew` and you don't plan on using it for anything else, you can hardcode the environment variables directly into the `homebrew-mxcl.tomcat.plist` configuration file for Tomcat. Just edit file located in `/usr/local/Cellar/tomcat/<version>/` and add the following just before the closing `</dict></plist>` tags.

```
<key>EnvironmentVariables</key>
<dict>
  <key>DB_DRIVER_CLASSNAME</key>
  <string>org.mariadb.jdbc.Driver</string>
  <key>DB_CONNECTION_STRING</key>
  <string>jdbc:mariadb://localhost:3306/mousespace?
user=mousedb&password=abc123</string>
  <key>MGI_DB_DRIVER_CLASSNAME</key>
  <string>org.postgresql.Driver</string>
  <key>MGI_CONNECTION_STRING</key>
  <string>jdbc:postgresql://mgi-adhoc.jax.org:5432/mgd?
username=mousedb&password=abc123</string>
  <key>SMTP_SERVER</key>
  <string></string>
  <key>SMTP_USER</key>
  <string></string>
  <key>SMTP_PW</key>
  <string></string>
  <key>SMTP_PORT</key>
  <string>1</string>
  <key>SMTP_SSL_ENABLED</key>
  <string>1</string>
  <key>GOOGLE_ANALYTICS_ACCOUNT</key>
  <string></string>
  <key>GOOGLE_ANALYTICS_DOMAIN_SUFFIX</key>
  <string>True</string>
</dict>
```

A sample `homebrew-mxcl.tomcat.plist` is [included in the repo](#)

# Mouse Inventory Database

---

The mouse inventory database is an application for tracking an institution's inventory of mice for genetics research.

## Features

See the [home page](https://github.com/musIndex/mouseinventory/tree/master) <https://github.com/musIndex/mouseinventory/tree/master>

## Getting Started

The following instructions assume you're working on a Mac.

### Installing Prerequisites

There are four prerequisites that are required to run MouseInventory.

- MariaDB
- Tomcat (version 9)
- Java (version 8)
- Maven (version 3)

The easiest way to install these is using **brew**, a package manager for the Mac.

### Mac

```
git clone git@github.com:musIndex/mouseinventory.git
```

1. install tomcat with brew
2. update tomcat users
3. start tomcat with the following command

## Developing

See the [development notes wiki](#) to learn about how to work with the code.

## Environment Variables

| Environment Variable    | Description                                   | Example                                                                                      |
|-------------------------|-----------------------------------------------|----------------------------------------------------------------------------------------------|
| DB_DRIVER_CLASSNAME     | Classname of the driver for the main database | <code>org.mariadb.jdbc.Driver</code>                                                         |
| DB_CONNECTION_STRING    | Connection string for the main database       | <code>jdbc:mariadb://localhost:3306/mousespace?user=fakeUser&amp;password=b4dp455w0rd</code> |
| MGI_DB_DRIVER_CLASSNAME | Classname of the driver for the MGI database. | <code>org.postgresql.Driver</code>                                                           |

| Environment Variable           | Description                                                                                         | Example                                                                                                  |
|--------------------------------|-----------------------------------------------------------------------------------------------------|----------------------------------------------------------------------------------------------------------|
| MGI_DB_CONNECTION_STRING       | Connection string for the MGI database                                                              | <code>jdbc:postgresql://mgi-adhoc.jax.org:5432/mgd?username=prodUser&amp;password=an0th3rp444w0rd</code> |
| SMTP_SERVER                    | <i>optional</i><br>The URL of the SMTP server.                                                      | <code>smtp.server.com</code>                                                                             |
| SMTP_USER                      | <i>optional</i><br>The username for connecting to SMTP server.                                      | <code>james.bond@mi6.com</code>                                                                          |
| SMTP_PW                        | <i>optional</i><br>The password for connecting to SMTP server.                                      | <code>lic3nset0k1ll</code>                                                                               |
| SMTP_PORT                      | <i>optional</i><br>The port used to connect to SMTP server..                                        | <code>465</code>                                                                                         |
| SMTP_SSL_ENABLED               | <i>optional</i><br>Whether or not to use encrypted SMTP ( <code>true</code> or <code>false</code> ) | <code>true</code>                                                                                        |
| GOOGLE_ANALYTICS_ACCOUNT       | <i>optional</i><br>The account for Google Analytics.                                                | <code>18988</code>                                                                                       |
| GOOGLE_ANALYTICS_DOMAIN_SUFFIX | <i>optional</i><br>The domain suffix used for Google Analytics.                                     | <code>www.example.com</code>                                                                             |

## Setting environment variables

There are a number of ways to set environment variables.

## Command line (Mac/Linux)

Assuming you use the command line to start Tomcat, you can also set the environment variables directly on the command line.

```
export DB_DRIVER_CLASSNAME=org.mariadb.jdbc.Driver
export DB_CONNECTION_STRING="jdbc:mariadb://localhost:3306/mousespace?
user=fakeUser&password=b4dp455w0rd"
export MGI_DB_DRIVER_CLASSNAME=org.postgresql.Driver
export MGI_DB_CONNECTION_STRING="jdbc:postgresql://mgi-adhoc.jax.org:5432/mgd?
username=prodUser&password=an0th3rp444w0rd"
export SMTP_SERVER=""
export SMTP_USER=""
export SMTP_PW=""
export SMTP_PORT=430
export SMTP_SSL_ENABLED=True
export GOOGLE_ANALYTICS_ACCOUNT=""
export GOOGLE_ANALYTICS_DOMAIN_SUFFIX=""
catalina start
```

## Adding to plist (Mac)

If you installed Tomcat using **brew** and you don't plan on using it for anything else, you can hardcode the environment variables directly into the **homebrew-mxcl.tomcat.plist** configuration file for Tomcat. Just edit file located in **/usr/local/Cellar/tomcat/<version>/** and add the following just before the closing **</dict></plist>** tags.

```
<key>EnvironmentVariables</key>
<dict>
  <key>DB_DRIVER_CLASSNAME</key>
  <string>org.mariadb.jdbc.Driver</string>
  <key>DB_CONNECTION_STRING</key>
  <string>jdbc:mariadb://localhost:3306/mousespace?
user=mousedb&password=abc123</string>
  <key>MGI_DB_DRIVER_CLASSNAME</key>
  <string>org.postgresql.Driver</string>
  <key>MGI_CONNECTION_STRING</key>
  <string>jdbc:postgresql://mgi-adhoc.jax.org:5432/mgd?
username=mousedb&password=abc123</string>
  <key>SMTP_SERVER</key>
  <string></string>
  <key>SMTP_USER</key>
  <string></string>
  <key>SMTP_PW</key>
  <string></string>
  <key>SMTP_PORT</key>
  <string>1</string>
  <key>SMTP_SSL_ENABLED</key>
  <string>1</string>
  <key>GOOGLE_ANALYTICS_ACCOUNT</key>
  <string></string>
  <key>GOOGLE_ANALYTICS_DOMAIN_SUFFIX</key>
  <string>True</string>
</dict>
```

A sample **homebrew-mxcl.tomcat.plist** is [included in the repo](#)
